# Supplementary material for: The gRNA-miRNA-gRNA Ternary Cassette Combining CRISPR/Cas9 with RNAi Approach Strongly Inhibits Hepatitis B Virus Replication
Source: PubMed Central journal article supplement — Theranostics. 2017 Jul 22;7(12):3090–105. doi: 10.7150/thno.18114 (PMC5566108; doi:10.7150/thno.18114), 2017-07-22
Supplement: thnov07p3090s1.pdf [file thnov07p3090s1.pdf]

The gRNA-miRNA-gRNA ternary cassette combining CRISPR/Cas9 with  
RNAi approach strongly inhibits hepatitis B virus replication

Jie Wang<sup>1†</sup>, Ran Chen<sup>1†</sup>, Ruiyang Zhang<sup>1†</sup>, Shanlong Ding<sup>1</sup>, Tianying Zhang<sup>2</sup>, Quan Yuan<sup>2</sup>, Guiwen Guan<sup>1</sup>, Xiangmei Chen<sup>1</sup>, Ting Zhang<sup>1</sup>, Hui Zhuang<sup>1</sup>, Frederick Nunes<sup>3</sup>, Timothy Block<sup>4</sup>, Shuang Liu<sup>5</sup>, Zhongping Duan<sup>5</sup>, Ningshao Xia<sup>2\*</sup>, Zhongwei Xu<sup>3\*</sup>, Fengmin Lu<sup>1\*</sup>

**Supplementary materials**

**Table S1. Oligo-nucleotides sequences for constructing gRNA-miR-HBV-gRNA cassette**

| Name                             | Sequences                                                                                                                                                                                                                                                                                                |
|----------------------------------|----------------------------------------------------------------------------------------------------------------------------------------------------------------------------------------------------------------------------------------------------------------------------------------------------------|
| <b>Pri-miR-31(22+21)/miR-HBV</b> | Top: 5'-TCGAGctgtaactcggaactggagaggGGTGAAGCGAAGTGCAC<br>ACGGgttgaactgggaacgACGTGTGCACATCGATTCACGGCtttctgtctgaca<br>gcagcttG-3'<br>Bottom: 5'-GATCCaagctgctgtcagacaggaaaGCCGTGAATCGATGTG<br>CACACGTcgttcccagttcaacCCGTGTGCACTTCGCTTCACCcctctccagttcc<br>gagttacagC-3'                                     |
| <b>Pri-miR-31(30+31)/miR-HBV</b> | Top: 5'-TCGAGtattgctcctgtaactcggaactggagaggGGTGAAGCGAAGT<br>GCACACGGgttgaactgggaacgACGTGTGCACATCGATTCACGGCtttctgt<br>tctgacagcagcttggtacctccG-3'<br>Bottom: 5'-GATCCggaggtagccaagctgctgtcagacaggaaaGCCGTGAA<br>TCGATGTGCACACGTcgttcccagttcaacCCGTGTGCACTTCGCTTCACC<br>cctctccagttccgagttacaggagcaataC-3' |
| <b>gRNA3</b>                     | Top:5'-CACCGCAAGCCTCCAAGCTGTGCCT-3'<br>Bottom:5'-AAACAGGCACAGCTTGGAGGCTTGC-3'                                                                                                                                                                                                                            |
| <b>gRNA4</b>                     | Top: 5'-CACCGCGAGGGAGTTCTTCTTCTAG-3'                                                                                                                                                                                                                                                                     |

---

Bottom: 5'-AAACCTAGAAGAAGAAGACTCCCTCGC-3'

---

**Table S2. The synthesized gene sequences for constructing gRNA-miR-HBV-gRNA ternary cassette and gRNA-gRNA binary cassette**

| Name                                   | Sequences                                                                                                                                                                                                                                                                                                                   |
|----------------------------------------|-----------------------------------------------------------------------------------------------------------------------------------------------------------------------------------------------------------------------------------------------------------------------------------------------------------------------------|
| <b>Pri-miR-31(38+40)/miR-HBV</b>       | 5'-agaCTCGAGagggatggtattgctcctgtaactcggaactggagaggGGTG<br>AAGCGAAGTGCACACGGgttgaactgggaacgACGTGTGCACATCG<br>ATTCACGGCtttctgtctgacagcagcttggtacctccgctcctgttcGGATCCgag-<br>3'                                                                                                                                                |
| <b>Pri-miR-31(38+40)/miR-HBVm</b>      | 5'-agaCTCGAGagggatggtattgctcctgtaactcggaactggagaggGGTG<br>AAGCGAATGGCATAGCGgttgaactgggaacgAGCTATGCCACATC<br>GATTCACGGCtttctgtctgacagcagcttggtacctccgctcctgttcGGATCCgag<br>-3'                                                                                                                                               |
| <b>Pri-miR-31(51+51)/miR-HBV-gRNA1</b> | 5'-agaCTCGAGcataacaacgaagaggatggtattgctcctgtaactcggaact<br>ggagaggGGTGAAGCGAAGTGCACACGGgttgaactgggaacgACGTG<br>TGCACATCGATTACGGCtttctgtctgacagcagcttggtacctccgctcctgttc<br>ctccttgtcttGGATCCgagCCTGCTGGTGGCTCCAGTTCGTTTTAGA<br>GCTAGAAATAGCAAGTTAAAATAAGGCTAGTCCGTTATCAA<br>CTTGAAAAAGTGGCACCGAGTCGGTGCtttttaccAAGCTTgca-3' |
| <b>Pri-miR-31(51+51)/miR-HBV-gRNA2</b> | 5'-agaCTCGAGcataacaacgaagaggatggtattgctcctgtaactcggaact<br>ggagaggGGTGAAGCGAAGTGCACACGGgttgaactgggaacgACGTG<br>TGCACATCGATTACGGCtttctgtctgacagcagcttggtacctccgctcctgttc<br>ctccttgtcttGGATCCgagGGTTGCGTCAGCAAACACTGTTTTAGA<br>GCTAGAAATAGCAAGTTAAAATAAGGCTAGTCCGTTATCAA<br>CTTGAAAAAGTGGCACCGAGTCGGTGCtttttaccAAGCTTgca-3'  |
| <b>U6-gRNA2</b>                        | 5'-agaCTCGAGtttttgaggccatttcccatgattccttcatattgcatatacagata<br>caaggctgttagagagataattggaattaattgactgtaaacacaaagatattagtacaaaatacgtg<br>acgtagaaagtaataatttctgggtagttgacgttttaaattatgttttaaattggactatcatatgctt<br>accgtaactgaaagtatttcgatttctggctttatatatcttGTGGAAAGGACGAAAC<br>ACCGTTGCGTCAGCAAACACTGTTTTAGAGCTAGAAATAG     |

---

CAAGTTAAAATAAGGCTAGTCCGTTATCAACTTGAAAAAGT  
GGCACCGAGTCGGTGCtttttaccAAGCTTgca-3'

**Table S3. Target sequences of the HBV-specific gRNAs in HBV genome**

| gRNA No. | Sequence (N <sub>19-20</sub> NGG, 5'-3') | Genotype |
|----------|------------------------------------------|----------|
| 1        | CCTGCTGGTGGCTCCAGTTC                     | A/B/C/D  |
| 2        | AGTGTTTGCTGACGCAACC                      | A/B/C/D  |
| 3        | CAAGCCTCCAAGCTGTGCCT                     | A/B/C/D  |
| 4        | CTAGAAGAAGAACTCCCTCG                     | A/B/C/D  |

**Table S4. The full DNA sequences of all gRNAa-miR-HBV-gRNAb cassettes**

| Name    | Sequences                                                                                                                                                                                                                                                                                                                                                                                                                  |
|---------|----------------------------------------------------------------------------------------------------------------------------------------------------------------------------------------------------------------------------------------------------------------------------------------------------------------------------------------------------------------------------------------------------------------------------|
| 3-H51-2 | 5'-GCAAGCCTCCAAGCTGTGCCTGTTTTAGAGCTAGAAATAGCAAG<br>TTAAAATAAGGCTAGTCCGTTATCAACTTGAAAAAGTGGCACCG<br>AGTCGGTGCCTCGAGcataacaacgaagaggatggtattgctcctgtaactcggaactgg<br>agaggGGTGAAGCGAAGTGCACACGGgttgaactggaacgACGTGTGCA<br>CATCGATTCACGGCtttctgtctgacagcagcttggctacctcctgctgttctcctgtcttG<br>GATCCgagGGTTGCGTCAGCAAACACTGTTTTAGAGCTAGAAATA<br>GCAAGTTAAAATAAGGCTAGTCCGTTATCAACTTGAAAAAGTGG<br>CACCGAGTCGGTGCtttttaccAAGCTT-3' |
| 3-H38-2 | 5'-GCAAGCCTCCAAGCTGTGCCTGTTTTAGAGCTAGAAATAGCAAG<br>TTAAAATAAGGCTAGTCCGTTATCAACTTGAAAAAGTGGCACCG<br>AGTCGGTGCCTCGAGagggatggtattgctcctgtaactcggaactggagaggGGTGA<br>AGCGAAGTGCACACGGgttgaactggaacgACGTGTGCACATCGATTC<br>ACGGCtttctgtctgacagcagcttggctacctcctgcttGGATCCgagGGTTGCG<br>TCAGCAAACACTGTTTTAGAGCTAGAAATAGCAAGTTAAAATAA<br>GGTAGTCCGTTATCAACTTGAAAAAGTGGCACCGAGTCGGTGCt<br>tttttaccAAGCTT-3'                         |

---

3-M38-2 5'-GCAAGCCTCCAAGCTGTGCCTGTTTTAGAGCTAGAAATAGCAAG  
TTAAAATAAGGCTAGTCCGTTATCAACTTGAAAAAGTGGCACCG  
AGTCGGTGCCTCGAGGagggatggtattgctcctgtaactcggactggagaggGGTG  
AAGCGAATGGCATAGCGgttgaactgggaacgAGCTATGCCAATCGATT  
CACGGCtttctgtctgacagcagcttggtacctccgctcctgttcGGATCCgagGGTTGC  
GTCAGCAAACACTGTTTTAGAGCTAGAAATAGCAAGTTAAAATA  
AGGCTAGTCCGTTATCAACTTGAAAAAGTGGCACCGAGTCGGTG  
CtttttaccAAGCTT-3'

3-H30-2 5'-GCAAGCCTCCAAGCTGTGCCTGTTTTAGAGCTAGAAATAGCAAG  
TTAAAATAAGGCTAGTCCGTTATCAACTTGAAAAAGTGGCACCG  
AGTCGGTGCCTCGAGtattgctcctgtaactcggactggagaggGGTGAAGCGA  
AGTGCACACGGgttgaactgggaacgACGTGTGCACATCGATTCACGGCtt  
tctgtctgacagcagcttggtacctccGGATCCgagGGTTGCGTCAGCAAACAC  
TGTTTTTAGAGCTAGAAATAGCAAGTTAAAATAAGGCTAGTCCGT  
TATCAACTTGAAAAAGTGGCACCGAGTCGGTGCtttttaccAAGCTT-  
3'

3-H22-2 5'-GCAAGCCTCCAAGCTGTGCCTGTTTTAGAGCTAGAAATAGCAAG  
TTAAAATAAGGCTAGTCCGTTATCAACTTGAAAAAGTGGCACCG  
AGTCGGTGCCTCGAGctgtaactcggactggagaggGGTGAAGCGAAGTG  
CACACGGgttgaactgggaacgACGTGTGCACATCGATTCACGGCtttctgtc  
tgacagcagcttGGATCCgagGGTTGCGTCAGCAAACACTGTTTTAGAG  
CTAGAAATAGCAAGTTAAAATAAGGCTAGTCCGTTATCAACTTG  
AAAAAGTGGCACCGAGTCGGTGCtttttaccAAGCTT-3'

4-H38-1 5'-GCGAGGGAGTTCTTCTTAGTTTTAGAGCTAGAAATAGCAAG  
TTAAAATAAGGCTAGTCCGTTATCAACTTGAAAAAGTGGCACCG  
AGTCGGTGCCTCGAGagggatggtattgctcctgtaactcggactggagaggGGTGA  
AGCGAAGTGCACACGGgttgaactgggaacgACGTGTGCACATCGATTC  
ACGGCtttctgtctgacagcagcttggtacctccgctcctgttcGGATCCgagCCTGCTG  
GTGGCTCCAGTTCGTTTTAGAGCTAGAAATAGCAAGTTAAAATA  
AGGCTAGTCCGTTATCAACTTGAAAAAGTGGCACCGAGTCGGTG  
CtttttaccAAGCTT-3'

---

The red letters were the sequences of gRNA, the sequences of HBV specific short guide RNA were highlighted in green for gRNAa and in yellow for gRNAb; The blue letters were the sequences of pri-miR31 and anti-HBV pri-miR-31 mimic, the sequences of miRNA were highlighted in dark blue; The sequences of XhoI and HindIII restriction endonucleases cutting sites were shown in bold fonts.

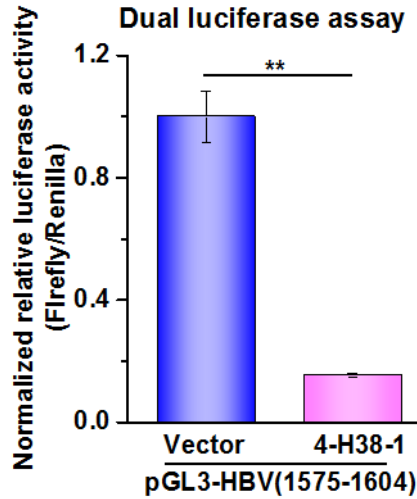

**Figure S1.** A dual-luciferase assay was conducted to analyze the level of miR-HBV produced by 4-H38-1 cassette. pGL3-HBV (1575-1604), PRL-TK and the expression plasmid containing 4-H38-1 cassette were co-transfected into HuH7 cells, and the dual-luciferase assay was performed. Data was shown as mean $\pm$ SD of 5 independent experiments.

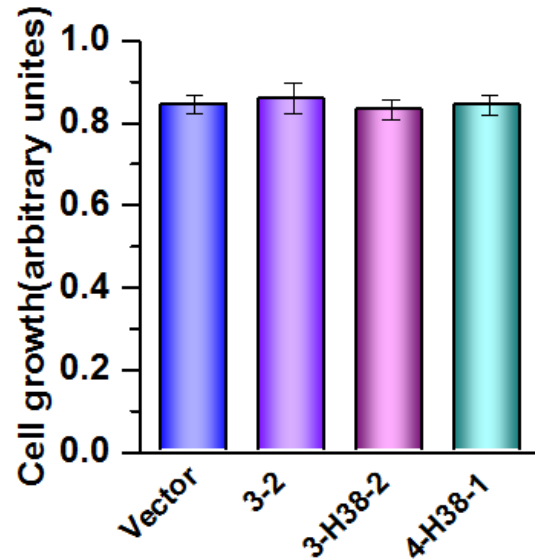

**Figure S2.** The cytotoxicity of 3-2 binary and gRNA-miR-HBV-gRNA ternary cassettes was examined using an MTT assay. Data was shown as mean $\pm$ s.e.m. of 5 independent experiments.

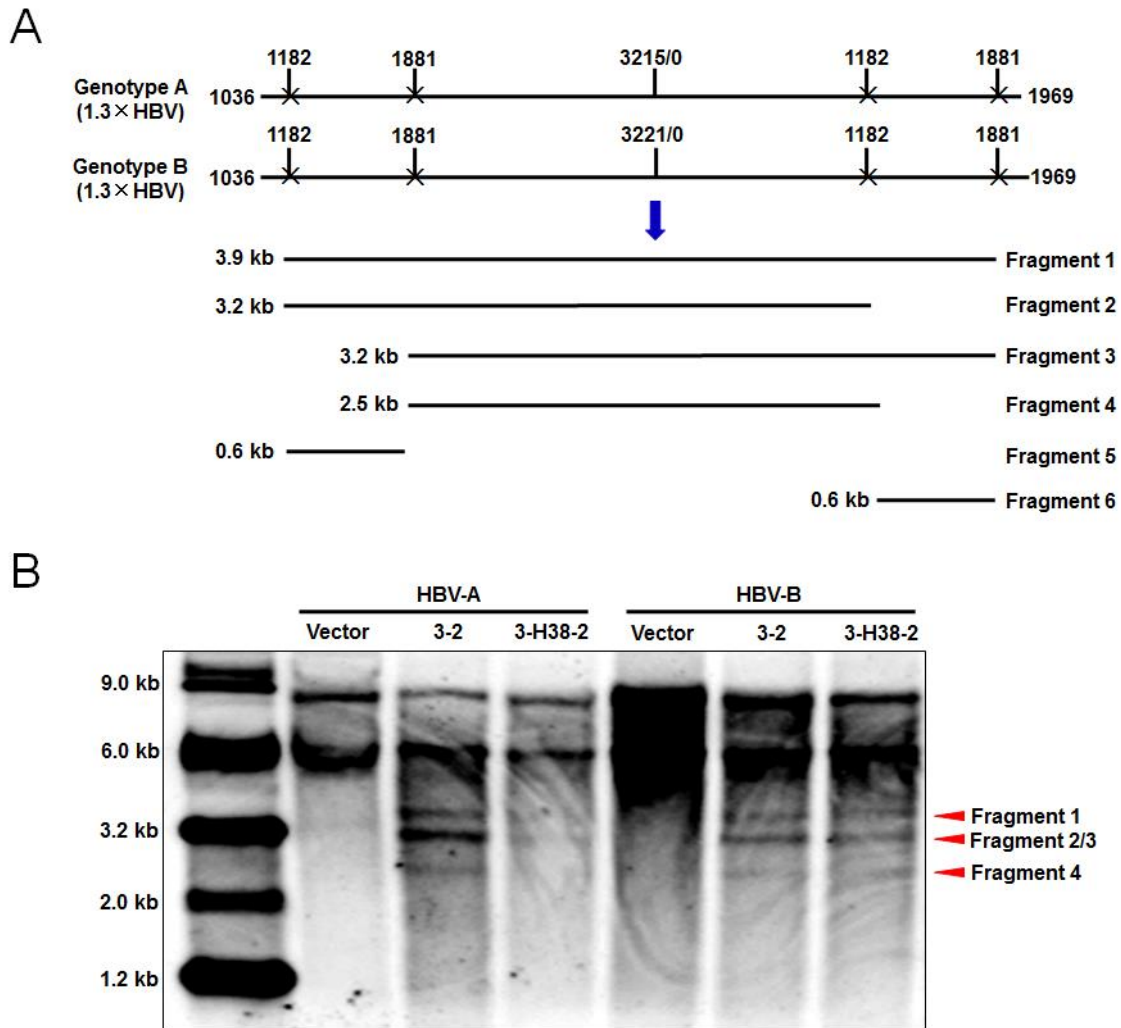

**Figure S3. The HBV-specific gRNAs-mediated destructions of HBV genome were detected by Southern Blot.** (A) Schematic illustration of Cas9/gRNA-mediated destruction of HBV genome (1.3×HBV expression plasmid). (B) The Cas9/gRNA-mediated destructions of HBV genome (1.3×HBV expression plasmid) were detected by Southern Blot. Vector group is the PX458 plasmid (the backbone of 3-2 and 3-H38-2 expression plasmid) was cotransfected with pGEM-HBV1.3A or pGEM-HBV1.3B into HuH7 cells.
